# Supplementary material for: Oncogenic KRAS activates an embryonic stem cell-like program in human colon cancer initiation
Source: PubMed Central journal article supplement (PMC4823026; doi:10.18632/oncotarget.6818), 2016-01-04
Supplement: oncotarget-07-2159-s001.pdf [file oncotarget-07-2159-s001.pdf]

# Oncogenic KRAS activates an embryonic stem cell-like program in human colon cancer initiation

## Supplementary Material

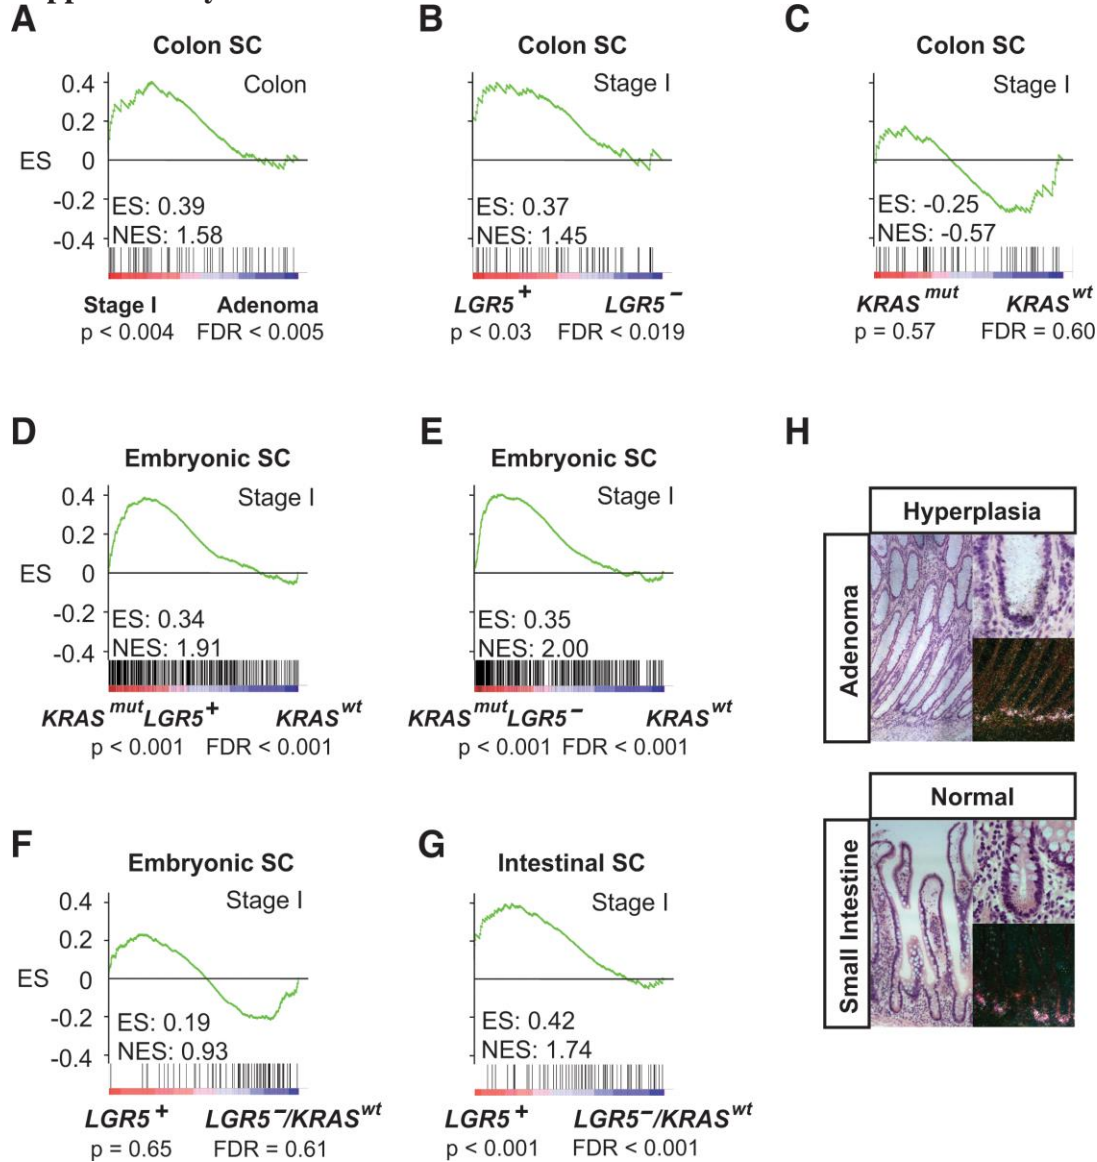

**Supplemental Figure 1.** **A**, GSEA on stage I colon carcinomas versus adenomas using a human colon SC signature [55]. **B-G**, GSEA on human stage I colon carcinomas stratified to *LGR5*, *KRAS* and combined *LGR5/KRAS* status as indicated using the colon SC (**B**, **C**), embryonic SC-like (**D-F**) and intestinal SC (**G**) signatures. ES, enrichment score; NES, normalized enrichment score; FDR, false discovery rate. **H**, Representative dark field images of *in situ* hybridization with  $^{33}\text{P}$ -probe specific for human *LGR5* mRNA and their corresponding H&E stainings showing specific *LGR5*<sup>+</sup> intestinal SC localization to the hyperplastic crypt bases of human colon adenoma and normal small intestine, respectively.

**Supplemental Table 1.** List of the genes in the embryonic SC-like, embryonic SC-like minus proliferation and *MYC*-related target genes, intestinal SC and EMT gene signatures used in GSEA.

**Supplemental Table 2.** List of the top 80 *KRAS*<sup>mut</sup> leading-edge genes enriched in the embryonic SC-like gene signature from GSEA of lenti-*KRAS*<sup>mut</sup> versus lenti-pCCL SW48 cells.

**Supplemental Table 3.** The median and mean *LGR5* mRNA expression levels in normal and malignant human tissues.
